# Supplementary material for: Inhibition of SARS-CoV-2 (previously 2019-nCoV) infection by a highly potent pan-coronavirus fusion inhibitor targeting its spike protein that harbors a high capacity to mediate membrane fusion
Source: Springer Nature journal article supplement (doi:10.1038/s41422-020-0305-x), 2020-03-30
Supplement: 41422_2020_305_MOESM1_ESM.pdf [file 41422_2020_305_MOESM1_ESM.pdf]

**a**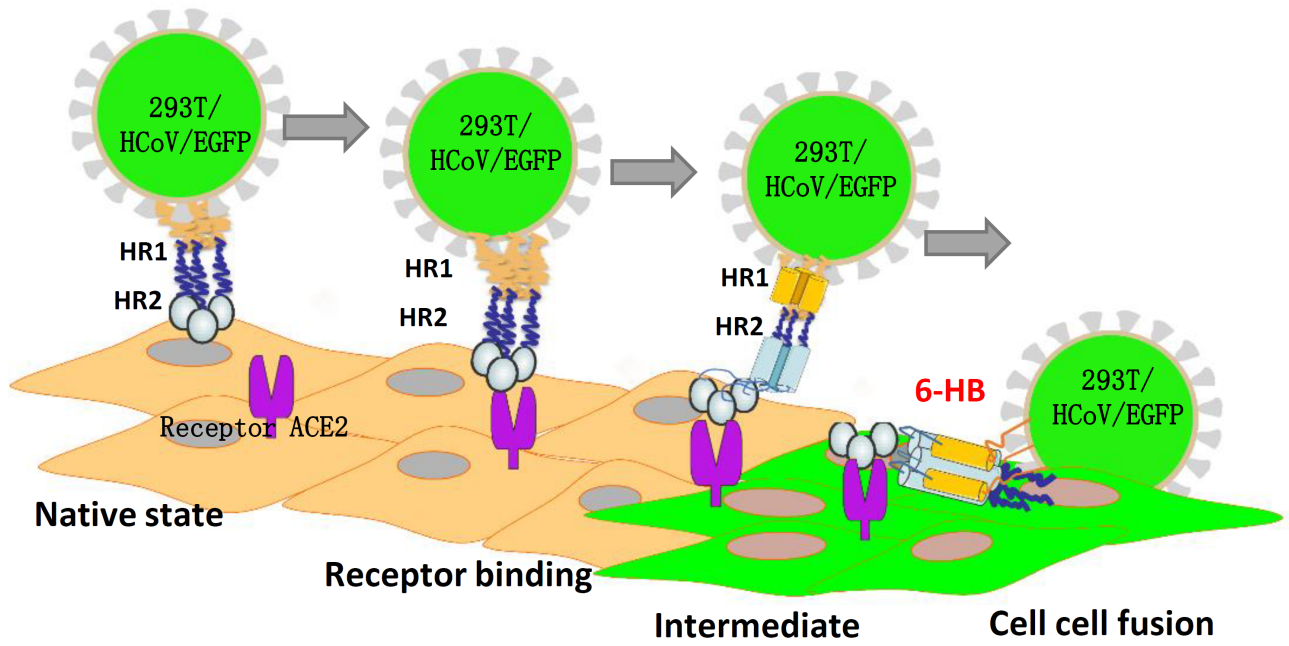**b**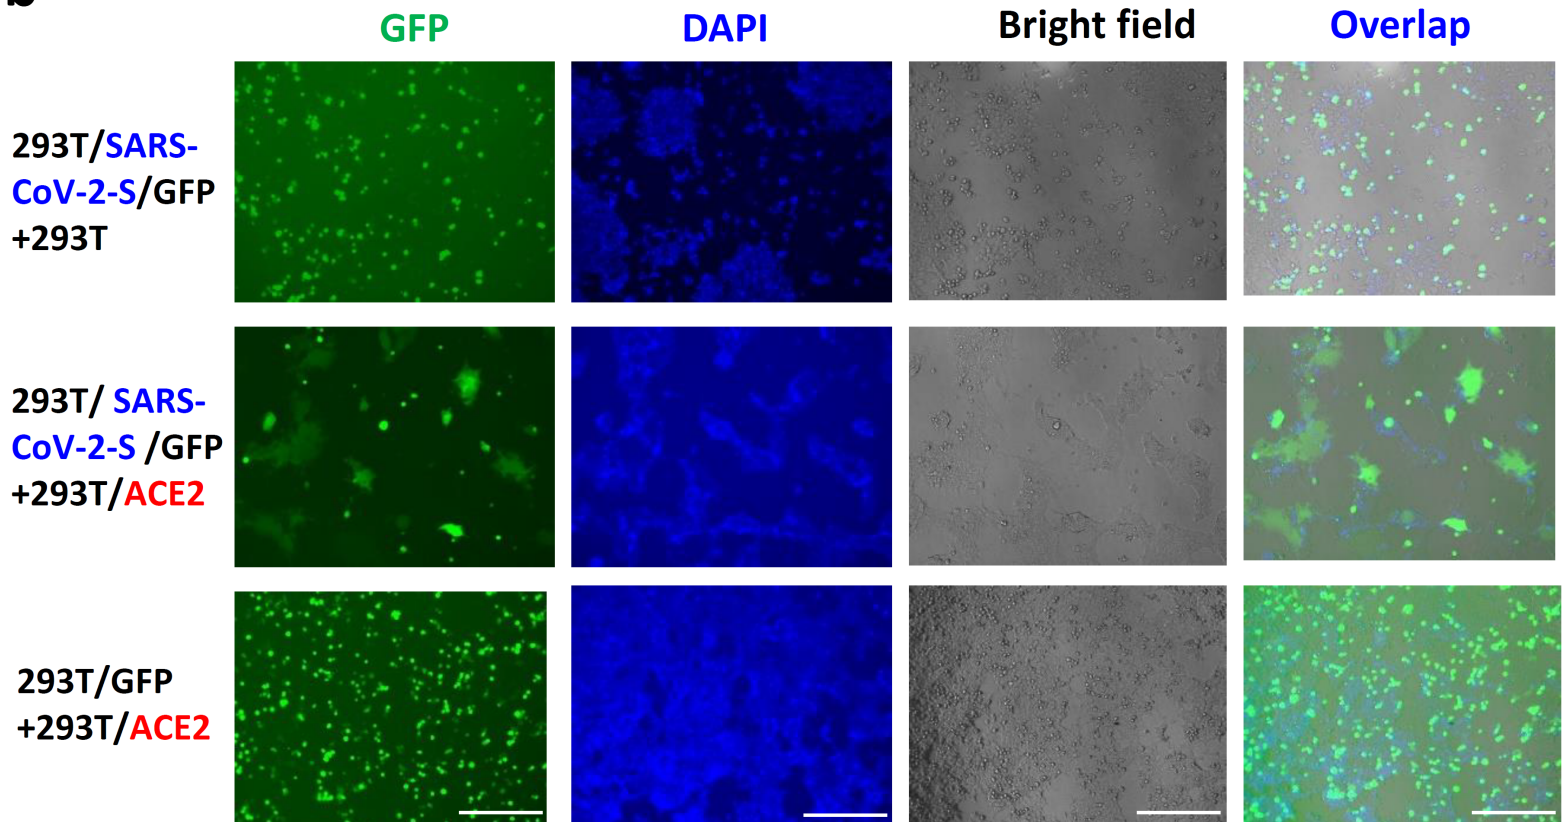

**Supplementary information, Fig. S1 Establishment of SARS-CoV-2 S-mediated cell-cell fusion.**

**a** . Schematic representation of SARS-CoV-2 S-mediated cell-cell fusion. **b**. Images of cell-cell fusion between 293T/SARS-CoV-2/EGFP cells and 293T cells (upper), 293T/SARS-CoV-2/EGFP cells and 293T/ACE2 cells (middle), 293T/EGFP cells and 293T/ACE2 cells (lower). Scale bar = 400  $\mu\text{m}$ .
