# Supplementary material for: Inhibition of SARS-CoV-2 (previously 2019-nCoV) infection by a highly potent pan-coronavirus fusion inhibitor targeting its spike protein that harbors a high capacity to mediate membrane fusion
Source: Springer Nature journal article supplement (doi:10.1038/s41422-020-0305-x), 2020-03-30
Supplement: 41422_2020_305_MOESM2_ESM.pdf [file 41422_2020_305_MOESM2_ESM.pdf]

e g e g e g e g e g e g e g

**HCov-NL63-HR1P** AASFNKA**INN**VAS**FSS**VNDAIT**QT**A**EAI**H**TV**T**IAL**N**KI**QDVVN**QQ**GSAL**NH**LT**SQ**  
**HCov-229E-HR1P** AASFNK**AM**T**NI**VDA**FT**G**VN**DAIT**QT**S**QAL**Q**TV**A**TAL**N**KI**QDVVN**QQ**GN**SL**NH**LT**S**Q**  
**HCov-OC43-HR1P** ANAF**NNAL**D**AI**Q**EG**F**D**AT.....NSAL**V**K**I**Q**AV**V**N**A**DAE**AL**NN**LL**Q**Q  
**MERS-CoV-HR1P** ANKF**NQ**AL**G**A**M**Q**T**G**F**T**T**.....NEA**F**R**K**V**Q**D**AV**N**N**NA**Q**AL**S**K**L**ASE  
**SARS-CoV-HR1P** ANQ**F**N**K**A**I**S**Q**I**Q**ES**L**T**T**.....S**T**A**L**G**K**L**Q**D**V**V**N**Q**NA**Q**AL**N**T**LV**K**Q  
**SARS-CoV-2-HR1P** ANQ**F**NSA**I**G**K**I**Q**DS**L**S**S**T.....A**S**A**L**G**K**L**Q**D**V**V**N**Q**NA**Q**AL**N**T**LV**K**Q

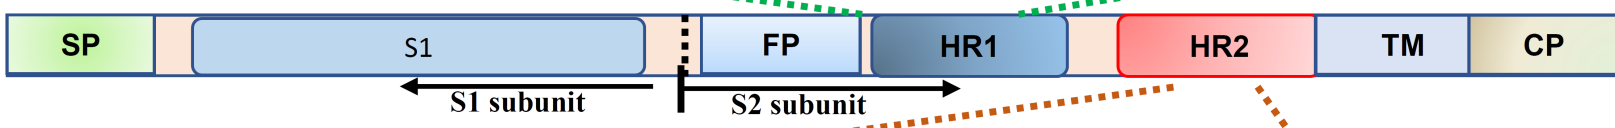

d a d a d a d a d a d

**HCov-NL63-HR2P** DLTPFN**L**TY**LN**LS**S**E**L**K**Q**LEAK**T**AS**L**F**Q**T**T**VE**L**Q**GL**I**D**Q**I**NS**T**Y**V**D**L**K**L**L  
**HCov-229E-HR2P** VVEQ**YN**Q**T**IL**N**L**T**SE**I**S**T**LE**N**K**S**A**E**L**N**Y**T**V**Q**K**L**Q**T**L**ID**N**I**NS**T**L**V**D**L**K**W**L  
**HCov-OC43-HR2P** SLDYIN**V**T**F**LD**L**Q**DEM**N.....R**L**Q**E**A**I**K**V**L**N**Q**S**Y**I**N**L**K**D**I  
**MERS-CoV-HR2P** SL**T**Q**I**N**T**T**L**L**D**L**T**Y**E**M**L**.....S**L**Q**Q**V**V**K**A**L**N**E**S**Y**I**D**L**K**E**L  
**SARS-CoV-HR2P** DISG**I**NAS**V**V**N**I**Q**KE**I**D.....R**L**NE**V**A**K**N**L**NE**S**L**I**D**L**Q**E**L  
**SARS-CoV-2-HR2P** DISG**I**NAS**V**V**N**I**Q**KE**I**D.....R**L**NE**V**A**K**N**L**NE**S**L**I**D**L**Q**E**L

**Supplementary information, Fig. S2 Schematic representation of HCoV S protein and the sequences of the designed peptides (HR1Ps and HR2Ps).**
