# Supplementary material for: Inhibition of SARS-CoV-2 (previously 2019-nCoV) infection by a highly potent pan-coronavirus fusion inhibitor targeting its spike protein that harbors a high capacity to mediate membrane fusion
Source: Springer Nature journal article supplement (doi:10.1038/s41422-020-0305-x), 2020-03-30
Supplement: 41422_2020_305_MOESM3_ESM.pdf [file 41422_2020_305_MOESM3_ESM.pdf]

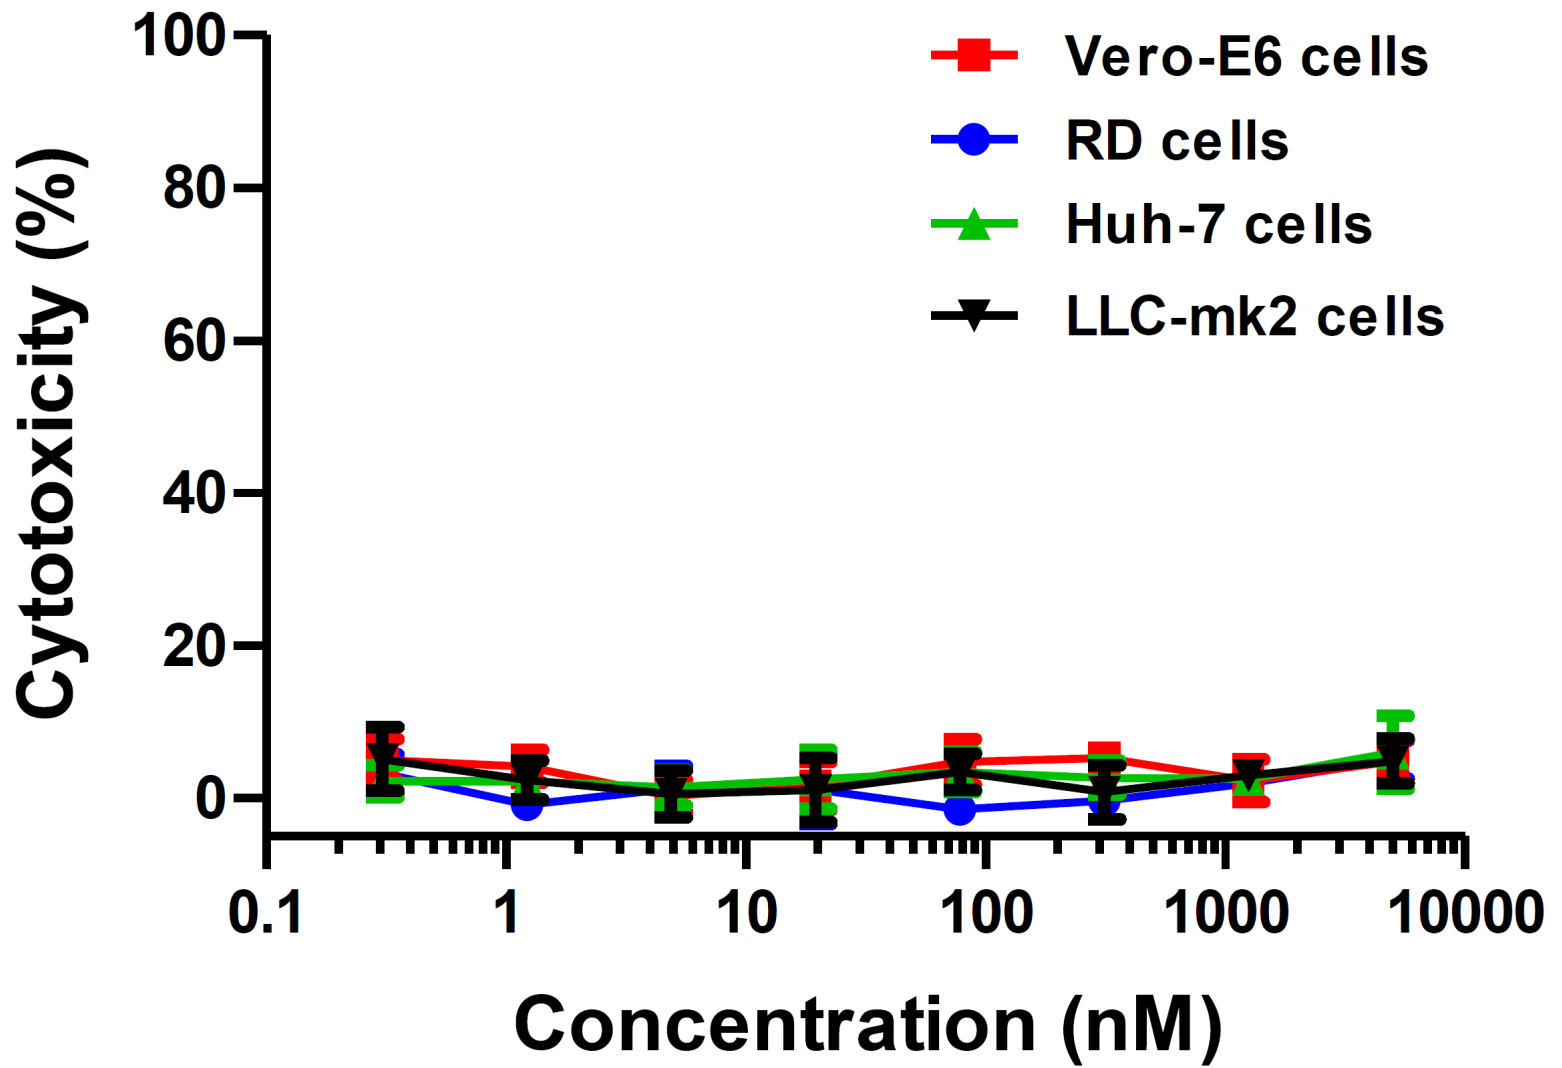

**Supplementary information, Fig. S3 Cytotoxicity of EK1C4 on Vero-E6, RD, Huh-7 and LLC-MK2 cells.**
