# Supplementary material for: Inhibition of SARS-CoV-2 (previously 2019-nCoV) infection by a highly potent pan-coronavirus fusion inhibitor targeting its spike protein that harbors a high capacity to mediate membrane fusion
Source: Springer Nature journal article supplement (doi:10.1038/s41422-020-0305-x), 2020-03-30
Supplement: 41422_2020_305_MOESM4_ESM.pdf [file 41422_2020_305_MOESM4_ESM.pdf]

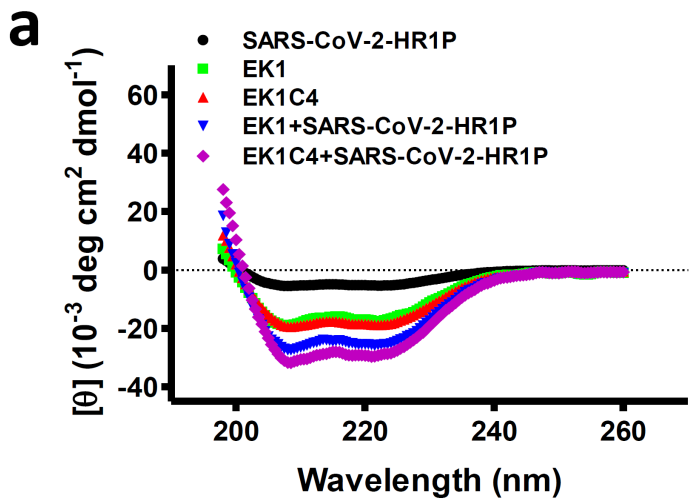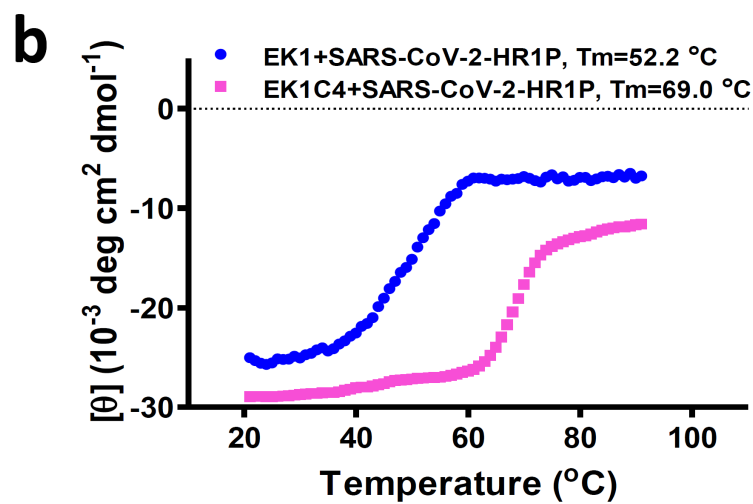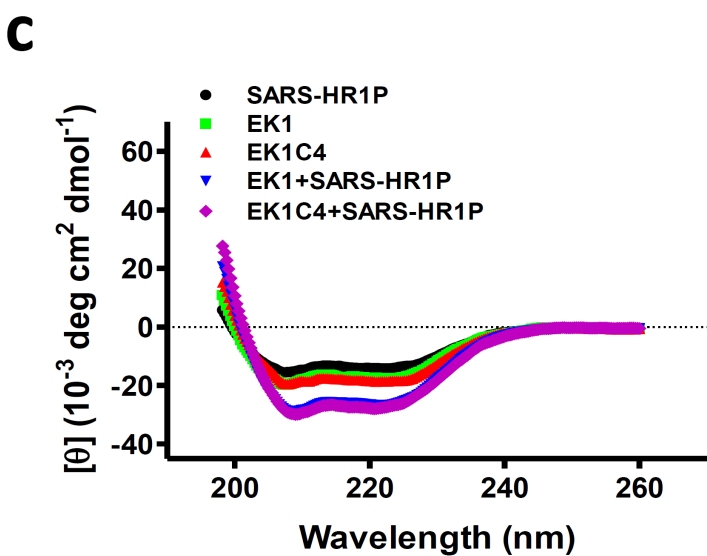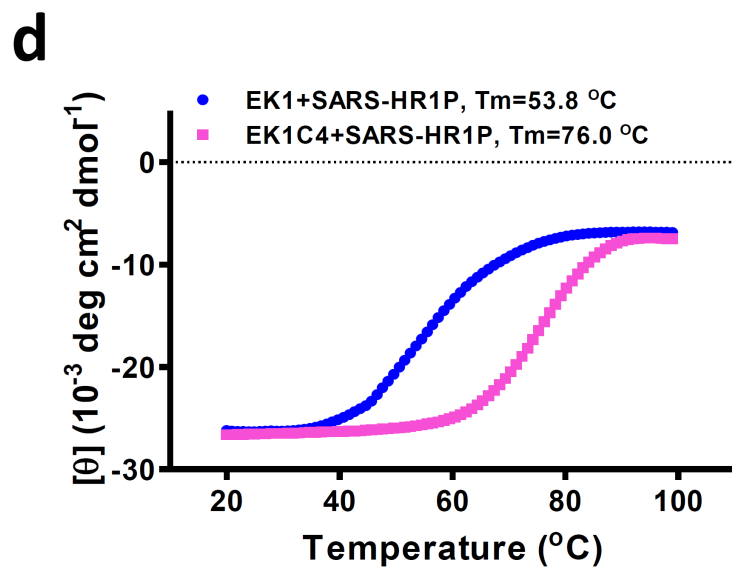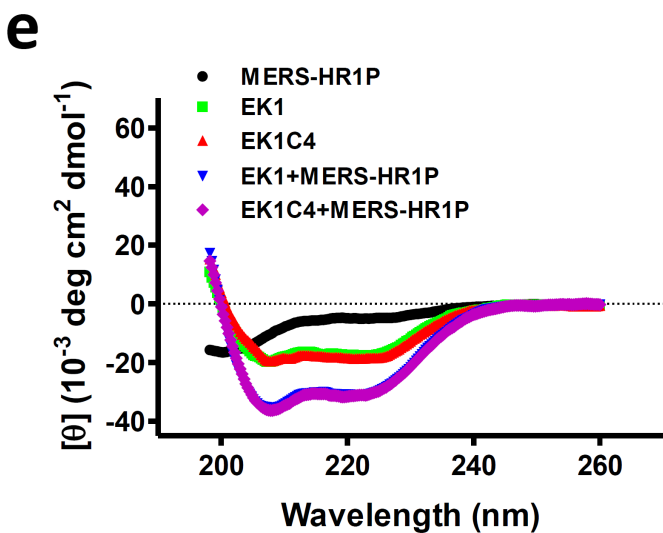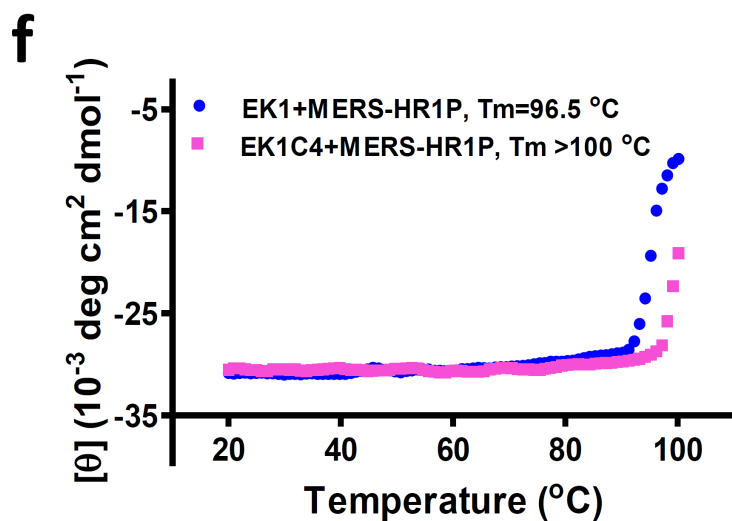

**Supplementary information, Fig. S4 Biophysical characterization of EK1C4 and its complexes with HR1Ps.** **a.** Circular-dichroism (CD) spectra for EK1, EK1C4, SARS-CoV-2-HR1P and their complexes in PBS. **b.** Melting curves of the complexes of EK1 / SARS-CoV-2-HR1P and EK1C4/SARS-CoV-2-HR1P. **c.** Circular-dichroism (CD) spectra for EK1, EK1C4, SARS-HR1P and their complexes in PBS. **d.** Melting curves of the complexes of EK1/SARS-HR1P and EK1C4/SARS-HR1P. **e.** Circular-dichroism (CD) spectra for EK1, EK1C4, MERS-HR1P and their complexes in PBS. **f.** Melting curves of the complexes of EK1/MERS-HR1P and EK1C4/MERS-HR1P.
