# Supplementary material for: Inhibition of SARS-CoV-2 (previously 2019-nCoV) infection by a highly potent pan-coronavirus fusion inhibitor targeting its spike protein that harbors a high capacity to mediate membrane fusion
Source: Springer Nature journal article supplement (doi:10.1038/s41422-020-0305-x), 2020-03-30
Supplement: 41422_2020_305_MOESM5_ESM.pdf [file 41422_2020_305_MOESM5_ESM.pdf]

**a**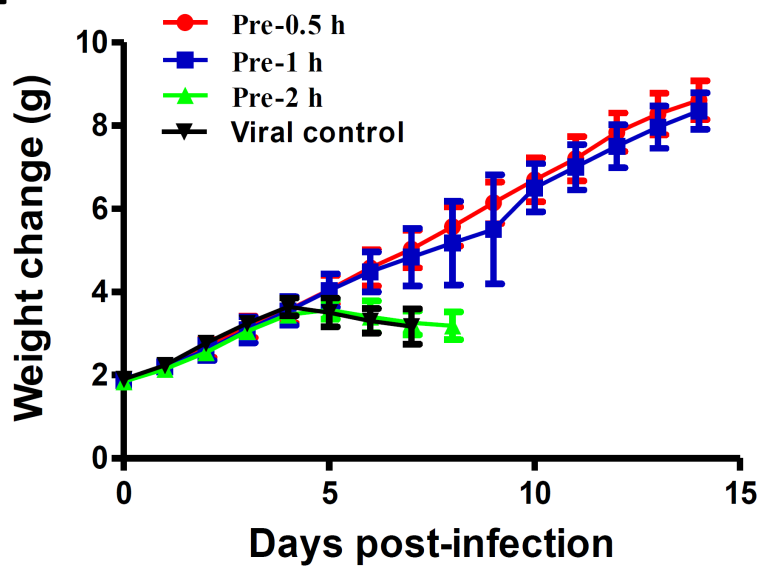**b**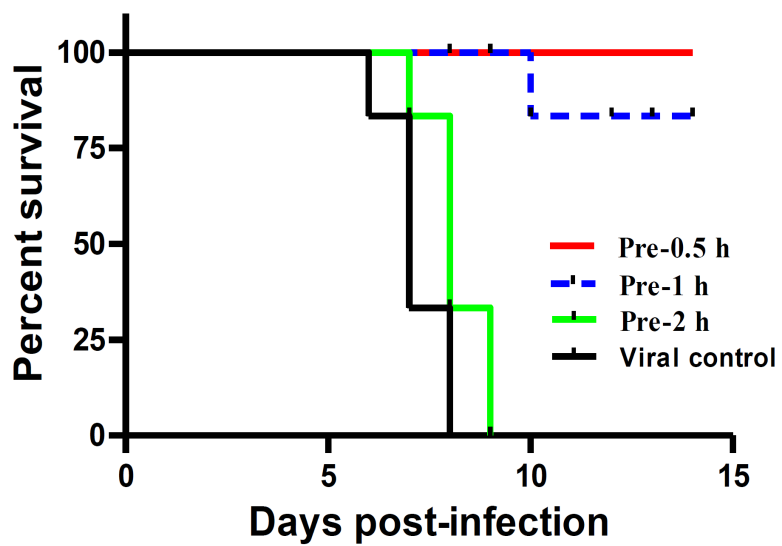

**Supplementary information, Fig. S5 *In vivo* prophylactic efficacy of EK1 against HCoV-OC43 infection in mice. a.** Body weight change of mice challenged with HCoV-OC43. **b.** Survival curves of mice challenged with HCoV-OC43.
