# Supplementary material for: Inhibition of SARS-CoV-2 (previously 2019-nCoV) infection by a highly potent pan-coronavirus fusion inhibitor targeting its spike protein that harbors a high capacity to mediate membrane fusion
Source: Springer Nature journal article supplement (doi:10.1038/s41422-020-0305-x), 2020-03-30
Supplement: 41422_2020_305_MOESM6_ESM.pdf [file 41422_2020_305_MOESM6_ESM.pdf]

**a**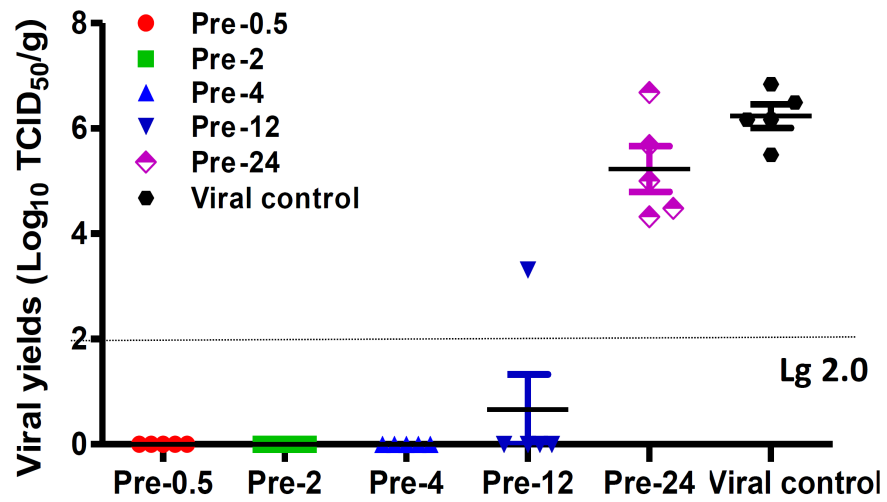**b**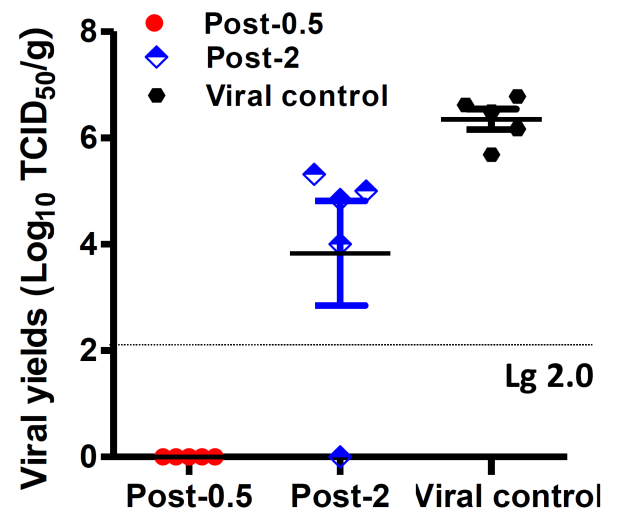**c**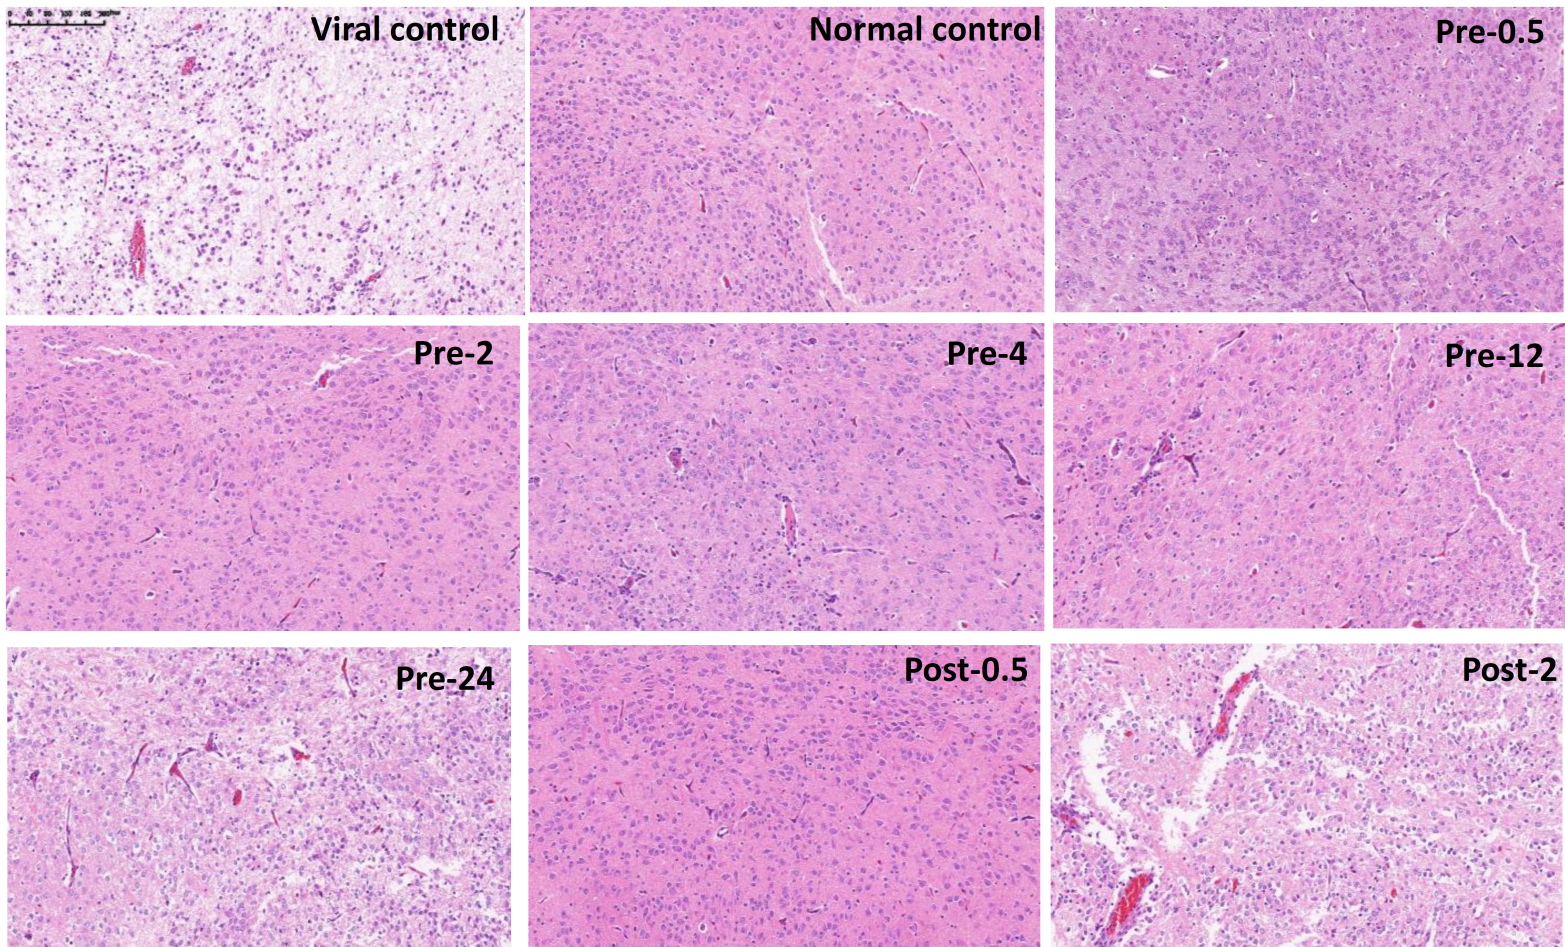

**Supplementary information, Fig. S6 The prophylactic and therapeutic effect of EK1C4 administered into mice before and after viral challenge, respectively. a.** Viral titer in brain tissues of mice in the viral control group and EK1C4-pre-treatment groups. The limit of detection is  $\lg 2.0$  TCID<sub>50</sub>/g. **b.** Viral titer in brain tissues in EK1C4-post-treatment groups. The limit of detection is  $\lg 2.0$  TCID<sub>50</sub>/g. **c.** Histological examination of mouse brains.
