# Supplementary material for: Inhibition of SARS-CoV-2 (previously 2019-nCoV) infection by a highly potent pan-coronavirus fusion inhibitor targeting its spike protein that harbors a high capacity to mediate membrane fusion
Source: Springer Nature journal article supplement (doi:10.1038/s41422-020-0305-x), 2020-03-30
Supplement: 41422_2020_305_MOESM7_ESM.pdf [file 41422_2020_305_MOESM7_ESM.pdf]

$\beta$ B

$\beta$ C

{

{

|  |                   |            | S1   S2             |             | Score       |
|--|-------------------|------------|---------------------|-------------|-------------|
|  | SARS-CoV          | AGICASYHTV | S----LLRST          | SQKSIVAYTM  | <0.5        |
|  | WIV1              | AGICASYHTV | S----SLRST          | SQKSIVAYTM  | <0.5        |
|  | Rs3367            | AGICASYHTV | S----SLRST          | SQKSIVAYTM  | <0.5        |
|  | RsSHC014          | AGICASYHTV | S----SLRST          | SQKSIVAYTM  | <0.5        |
|  | BtSL-CoVZXC21     | AGICASYHTA | S----ILRST          | GQKAI VAYTM | <0.5        |
|  | BtSL-CoVZC45      | AGICASYHTA | S----ILRST          | SQKAI VAYTM | <0.5        |
|  | <b>SARS-CoV-2</b> | AGICASYQTQ | TNSP <u>RRARS</u> V | ASQSI IAYTM | <b>0.62</b> |
|  | MERS-CoV          | SLCALPDTP  | STLT <u>RSVRS</u>   | VPGEMRLASIA | <b>0.56</b> |
|  | HKU4              | SLCAVP-PV  | STF <u>RSYSAS</u> - | ---QFQLAVLN | <0.5        |

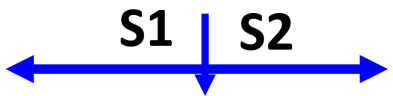

**Supplementary information, Fig. S7 Analysis of the S1/S2 furin-recognizable site  
in  $\beta$ -B and  $\beta$ -C coronaviruses.**
