# Supplementary material for: Inhibition of SARS-CoV-2 (previously 2019-nCoV) infection by a highly potent pan-coronavirus fusion inhibitor targeting its spike protein that harbors a high capacity to mediate membrane fusion
Source: Springer Nature journal article supplement (doi:10.1038/s41422-020-0305-x), 2020-03-30
Supplement: 41422_2020_305_MOESM9_ESM.pdf [file 41422_2020_305_MOESM9_ESM.pdf]

HR1

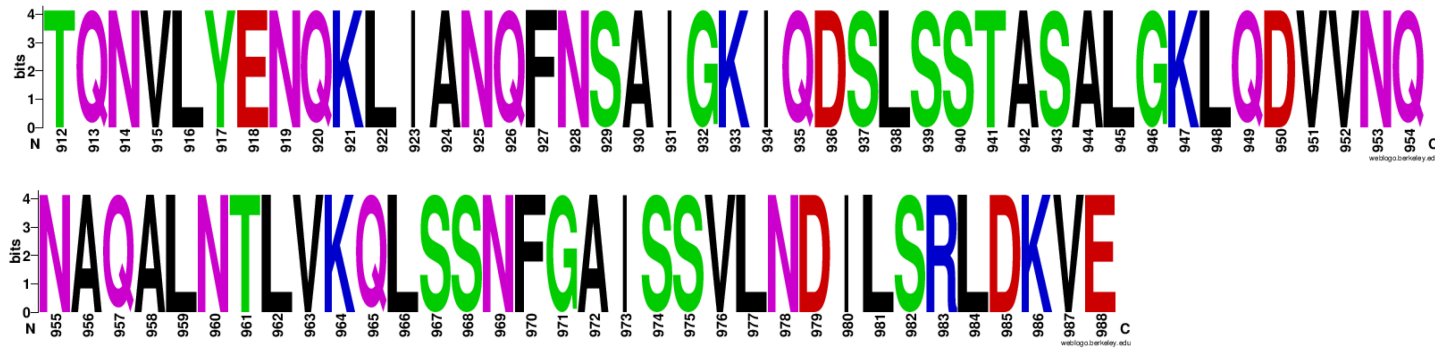

HR2

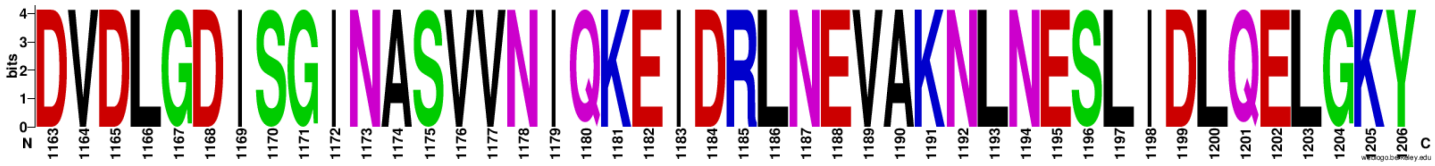

**Supplementary information, Fig. S9 The identical sequence of HR1 and HR2 domains in 103 SARS-CoV-2 genomes.**
